# Supplementary material
Source: publisher figshare collection journal article supplement (https://plos.figshare.com/articles/dataset/_/7099052)
Supplement: Supplementary file 1 [file 1]

Archive with 7 entries (7 files):
- pmed.1002651.s001.pdf
- pmed.1002651.s002.pdf
- pmed.1002651.s003.pdf
- pmed.1002651.s004.pdf
- pmed.1002651.s005.pdf
- pmed.1002651.s006.pdf
- pmed.1002651.s007.pdf
