# Supplementary material
Source: publisher figshare collection journal article supplement (https://plos.figshare.com/articles/dataset/_/7099052)

**S2 Fig. Participants' flowchart, EPIC cohort, 1992–2014.** EPIC, European Prospective Investigation into Cancer and Nutrition.

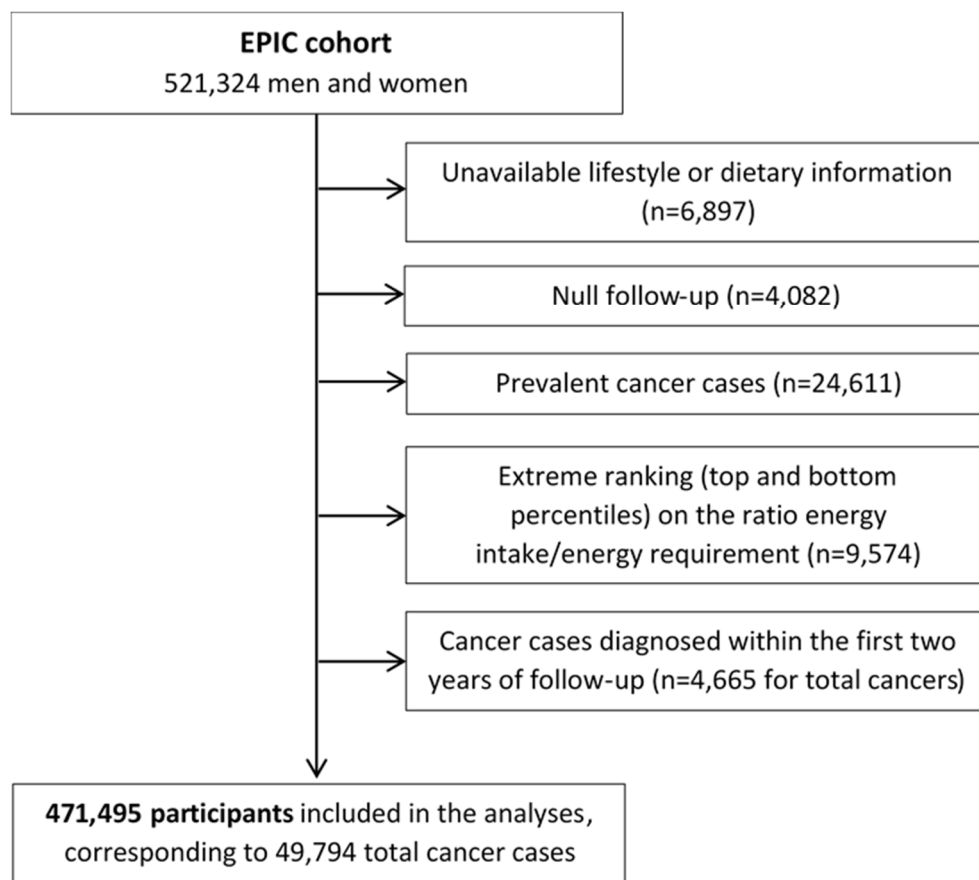

Supplement: Supplementary file 1 [file 1 › pmed.1002651.s002.pdf]
