# Supplementary material
Source: publisher figshare collection journal article supplement (https://plos.figshare.com/articles/dataset/_/7099052)
Supplement: Supplementary file 1 [file 1 › pmed.1002651.s003.pdf]

**S1 Table. Incident cancer cases and noncases by country, EPIC cohort, 1992–2014.** EPIC, European Prospective Investigation into Cancer and Nutrition.

|                              | Country           |                   |                   |                   |                   |                   |                   |                   |                   |                   |
|------------------------------|-------------------|-------------------|-------------------|-------------------|-------------------|-------------------|-------------------|-------------------|-------------------|-------------------|
|                              | France            | Italy             | Spain             | United Kingdom    | The Netherlands   | Greece            | Germany           | Sweden            | Denmark           | Norway            |
| <b>Non-case</b>              | 62,310<br>(93.3%) | 39,840<br>(90.3%) | 35,822<br>(90.1%) | 66,846<br>(89.5%) | 32,768<br>(90.5%) | 24,776<br>(95.8%) | 44,298<br>(92.2%) | 40,136<br>(83.5%) | 43,962<br>(81.1%) | 30,943<br>(91.8%) |
| <b>Incident cancer cases</b> | 4456<br>(6.67%)   | 4285<br>(9.71%)   | 3922<br>(9.87%)   | 7859<br>(10.5%)   | 3443<br>(9.51%)   | 1092<br>(4.22%)   | 3768<br>(7.84%)   | 7942<br>(16.5%)   | 10,279<br>(18.9%) | 2748<br>(8.16%)   |
