# Supplementary material
Source: publisher figshare collection journal article supplement (https://plos.figshare.com/articles/dataset/_/7099052)

**S1 Fig. The Nutri-Score front-of-pack nutritional label (Santé Publique France)**

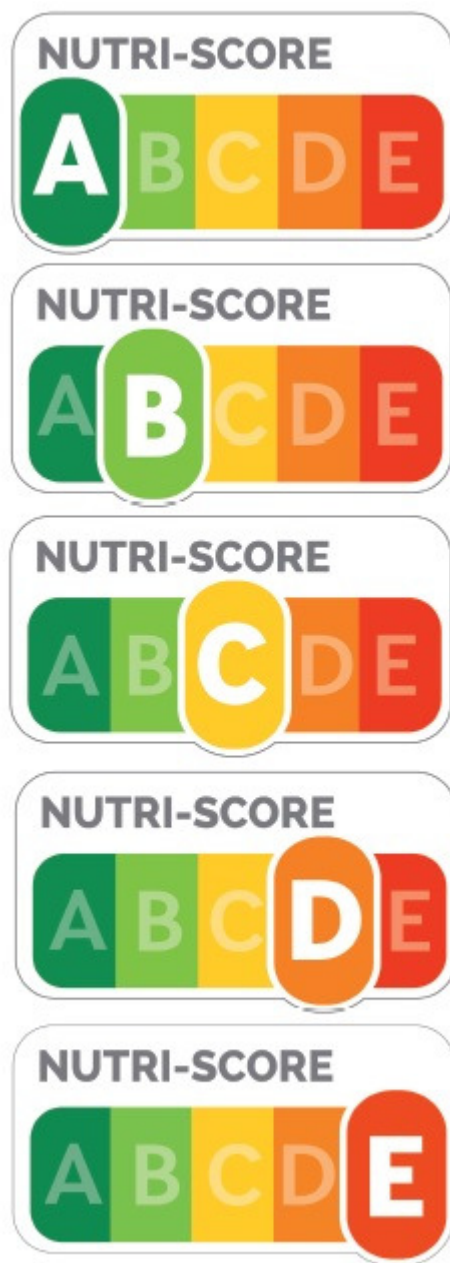

Supplement: Supplementary file 1 [file 1 › pmed.1002651.s001.pdf]
